# Supplementary material for: Promotional effect of the electron donating functional groups on the gas sensing properties of graphene nanoflakes
Source: Royal Society of Chemistry journal article supplement (doi:10.1039/c5ra10298g), 2015-01-01
Supplement: c5ra10298g1.pdf [file c5ra10298g1.pdf]

## Supporting Information

Promotional effect of the electron donating functional groups on the gas sensing properties of graphene nanofakes

Akbar Omidvar and Afshan Mohajeri\*

Department of Chemistry, College of Sciences, Shiraz University, Shiraz, Iran

### Corresponding Author

\* E-mail: amohajeri@shirazu.ac.ir.

Phone: +98-7136137161. Fax: +98-7136460788.

**Table S1.** Adsorption energy ( $E_{ad}$ ), and change in the band gap for the adsorption of  $O_2$  molecule on the pristine (P-GNF), B-doped ( $B_D$ -GNF), N-doped ( $N_D$ -GNF), and functionalized GNFs: COOH-GNF, CN-GN, and  $NO_2$ -GNF.

| System              | $\Delta E_g$ (%) | $E_{ad}$<br>(kcal mol <sup>-1</sup> ) |
|---------------------|------------------|---------------------------------------|
| $O_2$ / P- GNF      | 8.30             | 0.127                                 |
| $O_2$ / $B_D$ -GNF  | 2.40             | -40.45                                |
| $O_2$ / $N_D$ -GNF  | -14.30           | -35.78                                |
| $O_2$ /COOH-GNF     | 0                | -4.60                                 |
| $O_2$ /CN-GNF       | 4                | -2.80                                 |
| $O_2$ / $NO_2$ -GNF | 4.20             | -6.30                                 |

**Table S2.** Adsorption energy ( $E_{ad}$ ) and change in the band gap for the adsorption of NO molecule on the pristine (P-GNF), B-doped ( $B_D$ -GNF), N-doped ( $N_D$ -GNF), and functionalized GNFs: COOH-GNF, CN-GN, and  $NO_2$ -GNF.

| System             | $\Delta E_g$ (%) | $E_{ad}$<br>(kcal mol <sup>-1</sup> ) |
|--------------------|------------------|---------------------------------------|
| NO_N /P-GNF        | 508              | -26.70                                |
| NO_N / $B_D$ -GNF  | -82              | 33.70                                 |
| NO_N / $N_D$ -GNF  | -75              | 43.90                                 |
| NO_N /COOH-GNF     | 550              | -27.37                                |
| NO_N /CN-GNF       | 548              | -27.08                                |
| NO_N / $NO_2$ -GNF | 533              | -29.58                                |
| NO_O /P-GNF        | 521              | -27.00                                |
| NO_O / $B_D$ -GNF  | -77              | 46.50                                 |
| NO_O / $N_D$ -GNF  | -75              | 45.28                                 |
| NO_O /COOH-GNF     | 555              | -27.67                                |
| NO_O /CN-GNR       | 512              | -27.47                                |
| NO_O / $NO_2$ -GNF | 529              | -29.70                                |

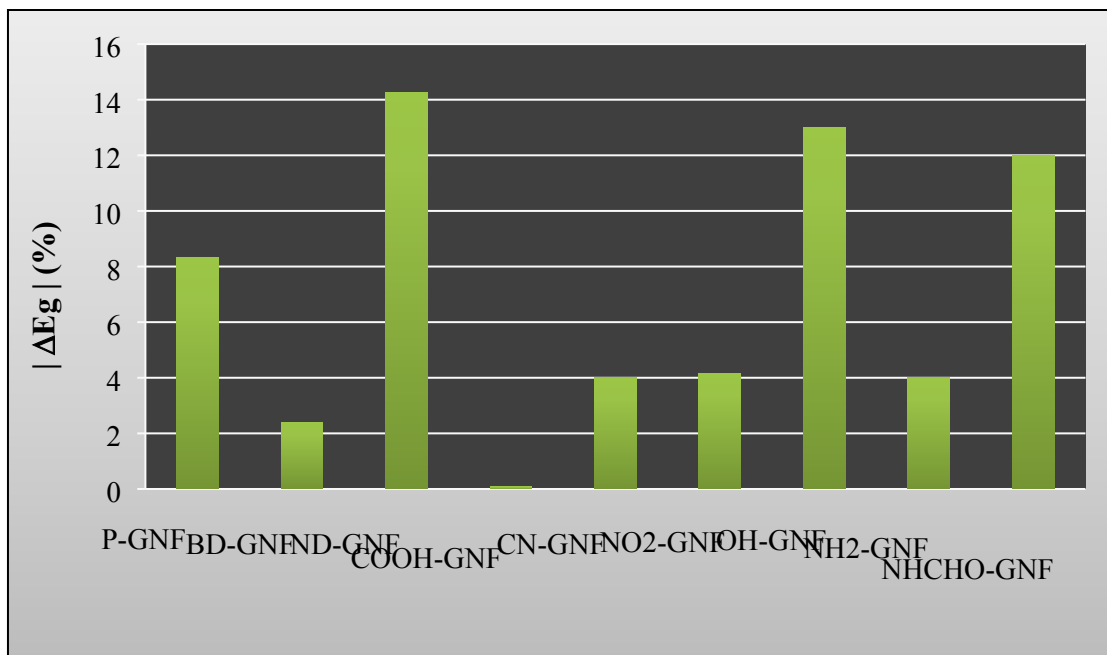

**Figure S1.** The absolute value of the change in the band gap as a result of O<sub>2</sub> adsorption on various GNFs studied in present and previous works.
